# Supplementary material for: Fabrication of a micellar heteropolyacid with Lewis–Brønsted acid sites and application for the production of 5-hydroxymethylfurfural from saccharides in water
Source: Royal Society of Chemistry journal article supplement (doi:10.1039/c4ra16952b), 2015-01-01
Supplement: c4ra16952b1.pdf [file c4ra16952b1.pdf]

**Fabrication of micellar heteropolyacid with Lewis-Brønsted acid sites and application for  
the production of 5-hydroxymethylfurfural from saccharides in water**

Ying Lu<sup>a</sup>, Zhong Sun<sup>b</sup>, Mingxin Huo<sup>a,\*</sup>

<sup>a</sup> School of Environment, Northeast Normal University, Changchun, 130024, P.R. China

<sup>b</sup> Key Lab of Polyoxometalate Science of Ministry of Education, Faculty of Chemistry, Northeast  
Normal University, Changchun 130024, P. R. China

Postal address: Northeast Normal University, 5268 Renmin Street, Changchun, Jilin Province,  
130024, P. R. China

Supporting information

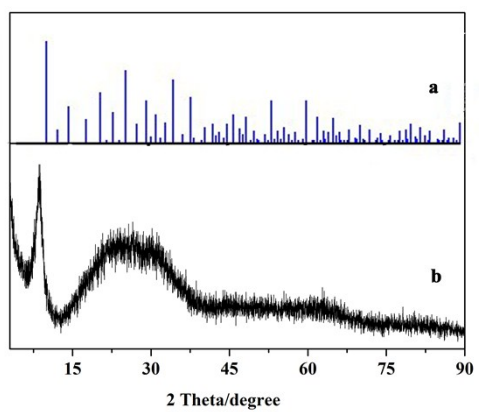

**Fig. S1.** XRD patterns of (a)  $\text{H}_3\text{PW}_{12}\text{O}_{40}$  and (b)  $(\text{C}_{16}\text{TA})\text{H}_4\text{PW}_{11}\text{Ti}$

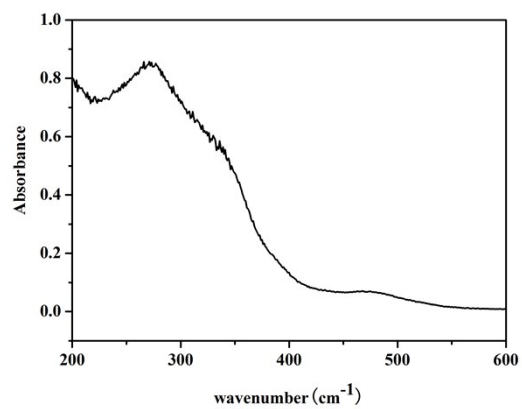

**Fig. S2.** The UV-vis pattern of  $(C_{16}TA)H_4PW_{11}Ti$

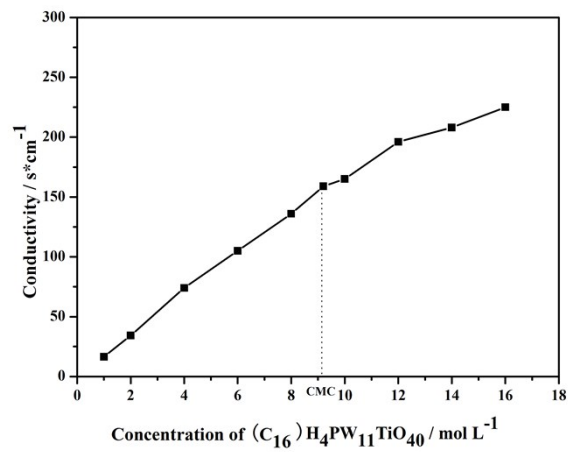

**Fig. S3.** The conductivity of  $(\text{C}_{16})\text{H}_4\text{PW}_{11}\text{Ti}$  at the room temperature.

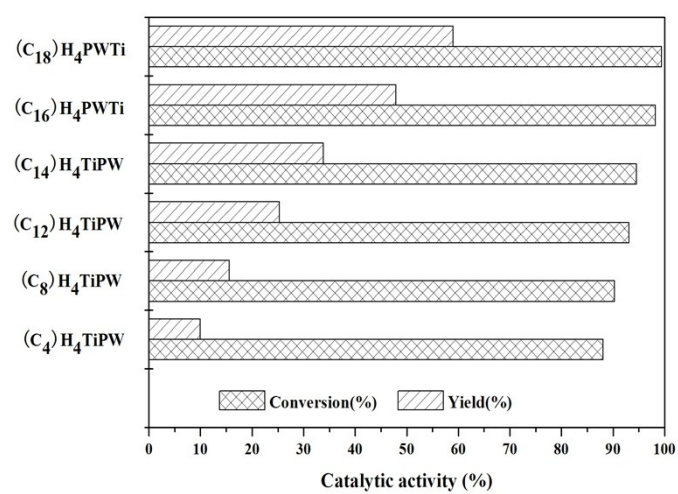

**Fig. S4.** The influence of the carbon chain length on the conversion of fructose into HMF.  
Reaction conditions: 0.6 g of fructose, 0.01 mmol of catalyst, 2 mL of water, 130 °C for 90 min.

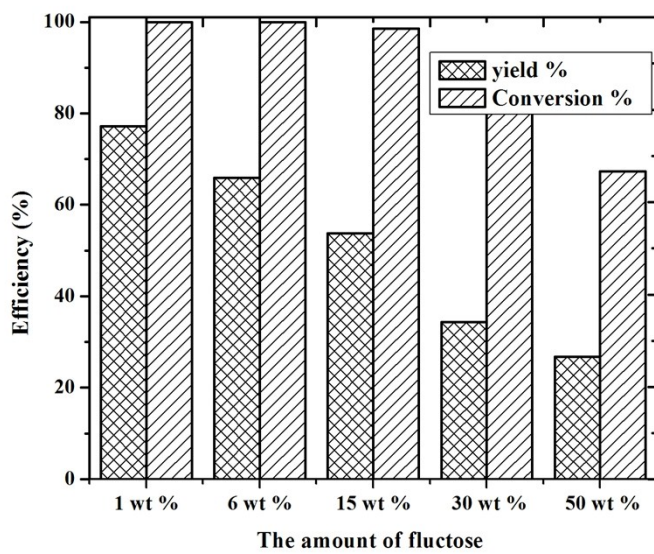

**Fig. S5.** The influence of the amount of fructose on the conversion. Reaction conditions: 0.01 mmol of catalyst, 2 mL of water, 130 °C for 30 min.

**Table S1** The comparison between different catalysts on dehydration of glucose to HMF

| Catalysts                            | System                    | Concentration<br>(wt%) | T(°C) | time  | Yield(%<br>) | Con.(%) | Ref |
|--------------------------------------|---------------------------|------------------------|-------|-------|--------------|---------|-----|
| NbPO-pH 2                            | water                     | 5                      | 140°C | 60min | 14.1         | 24.4    | 1   |
| NbPO-pH 7                            | water                     | 5                      | 140°C | 60min | 33.6         | 68.1    | 1   |
| HCl                                  | C <sub>12</sub> MI.Cl     | 10                     | 120°C | 8min  | 30           | 79      | 2   |
| HCl                                  | C <sub>12</sub> MI.Cl     | 10                     | 120°C | 12min | 34           | 75      | 2   |
| InCl <sub>3</sub>                    | water                     | 5                      | 180°C | 5min  | 52.0         | 81.9    | 3   |
| InCl <sub>3</sub>                    | water                     | 5                      | 180°C | 10min | 59.8         | 91.4    | 3   |
| InCl <sub>3</sub>                    | NaCl-H <sub>2</sub> O/THF | 4.5                    | 200°C | 2h    | 50.9         | 99      | 4   |
| CrCl <sub>3</sub> ·6H <sub>2</sub> O | water                     | 5                      | 110°C | 30min | 10.5         | 12.0    | 5   |
| Hβ-zeolite                           | [BMIM]Cl                  | 10                     | 150°C | 50min | 50.3         | 80.6    | 6   |
| InCl <sub>3</sub>                    | water                     | 5                      | 180°C | 10min | 59.8         | 91.4    | 7   |

|                                                                                   |                        |     |        |       |      |      |    |
|-----------------------------------------------------------------------------------|------------------------|-----|--------|-------|------|------|----|
| SO <sub>4</sub> /ZrO <sub>2</sub>                                                 | water                  | -   | 100 °C | 6h    | 1.0  | 20.9 | 8  |
| Beta-ST600                                                                        | Water/DMSO             | 3   | 180°C  | 3h    | 43   | 78   | 9  |
| Sn-MCM-41(50)                                                                     | [EMIM]Br               | 10  | 110°C  | 4h    | 70   | 99   | 10 |
| SO <sub>4</sub> <sup>2-</sup> /ZrO <sub>2</sub> -TiO <sub>2</sub>                 | n-butanol/water        | 6   | 170°C  | 2h    | 26.0 | 96.5 | 11 |
| phosphate/TiO <sub>2</sub>                                                        | Water/THF              | 10  | 120 °C | 2h    | 81.2 | 98   | 12 |
| IL-5                                                                              | Water/MIBK             | 30  | 120 °C | 6h    | 78.4 | 99.8 | 13 |
| TiHP                                                                              | water-<br>NaCl/THF     | 25  | 140 °C | 3h    | 17   | 29   | 14 |
| Zr-MCM-550                                                                        | Water/MIBK             | 10  | 175 °C | 2.5h  | 23   | 82   | 15 |
| CrCl <sub>2</sub> -Im-SBA-15                                                      | Water/DMSO             | 10  | 100 °C | 3h    | 35   | 51   | 16 |
| Mesoporous tantalum<br>phosphate                                                  | Water/MIBK             | 10  | 170 °C | 1h    | 32.8 | 56.3 | 17 |
| Mesoporous tantalum oxide                                                         | Water/MIBK             | 10  | 175 °C | 90min | 23   | 69   | 18 |
| ZrP                                                                               | Water/diglyme          | 10  | 180 °C | 3h    | 63   |      | 19 |
| TiO <sub>2</sub>                                                                  | Water                  | 2   | 140 °C | 6h    | 30   | 80   | 20 |
| CrCl <sub>3</sub>                                                                 | Et-DBUBS               | 10  | 100 °C | 3h    | 78.6 | 93   | 21 |
| ZrSil /Amberlyst-15                                                               | THF/H <sub>2</sub> O   | 5   | 180 °C | 1.5h  | 39   | 87   | 22 |
| K-10 clay-CrCl <sub>3</sub>                                                       | [BMIM]Cl               | 4.5 | 120 °C | 2h    | 56.3 |      | 23 |
| AlCl <sub>3</sub> /NaI                                                            | DMAC                   | 4.5 | 130 °C | 15min | 62   | 86   | 24 |
| H <sub>3</sub> PO <sub>4</sub> / NaH <sub>2</sub> PO <sub>4</sub>                 | Water                  | 10  | 160 °C | 90min | 39.5 | 83.2 | 25 |
| Amberlyst-70 resin                                                                | DMSO                   | 7.6 | 140 °C | 24h   | 32.0 | 98.1 | 26 |
| [C <sub>3</sub> SO <sub>3</sub> HMIM][HSO <sub>4</sub> ]/ CoCl <sub>2</sub>       | [AMIM]Cl               | 9   | 120 °C | 2h    | 62.2 | 95.5 | 27 |
| H <sub>3</sub> BO <sub>3</sub> /SiO <sub>2</sub>                                  | [bmim]HSO <sub>4</sub> | 10  | 120 °C | 3h    | 81   |      | 28 |
| H <sub>3</sub> PO <sub>4</sub> /Nb <sub>2</sub> O <sub>5</sub> ·nH <sub>2</sub> O | Water                  | 1   | 120 °C | 3h    | 47.9 | 92   | 29 |
| P-VI-0/P-SO <sub>3</sub> H-154                                                    | THF/DMSO               | 2   | 100 °C | 10h   | 95.4 |      | 30 |

1 Y. Zhang, J. J. Wang, X. C. Li, X. H. Liu, Y. J. Xia, B. C. Hu, G. Z. Lu, Y. Q. Wang, Direct conversion of biomass-derived carbohydrates to 5-hydroxymethylfurfural over water-tolerant niobium-based catalysts, *Fuel.*, 2015, 139, 301-307.

2 F. C. Melo, R. F. Souza, P. L. Coutinho, M. O. Souza, Synthesis of 5-Hydroxymethylfurfural from Dehydration of Fructose And Glucose Using Ionic Liquids, *J. Braz. Chem. Soc.*, 2014, 25,



2378-2384.

3 Y. Shen, J. K. Sun, Y. X. Yi, B. Wang, F. Xu, R. C. Sun, 5-Hydroxymethylfurfural and levulinic acid derived from monosaccharides dehydration promoted by  $\text{InCl}_3$  in aqueous medium, J. Mol. Catal. A: Chem., 2014, 394, 114-120.

4 Y. Shen, J. K. Sun, Y. X. Yi, M. F. Li, B. Wang, F. Xu, R. C. Sun,  $\text{InCl}_3$ -catalyzed conversion of carbohydrates into 5-hydroxymethylfurfural in biphasic system, Bioresource Technol., 2014, 172, 457-460.

5 S. Y. Jia, K. R. Liu, Z. W. Xu, P. F. Yan, W. J. Xu, X. M. Liu, Z. C. Zhang, Reaction media dominated product selectivity in the isomerization of glucose by chromium trichloride: From aqueous to non-aqueous systems, Catal. Today., 2014, 234, 83-90.

6 L. Hu, Z. Wu, J. X. Xu, Y. Sun, L. Lin, S. J. Liu, Zeolite-promoted transformation of glucose into 5-hydroxymethylfurfural in ionic liquid, Chem. Eng. J., 2014, 244, 137-144.

7 Y. Shen, Y. F. Xu, J. K. Sun, B. Wang, F. Xu, R. C. Sun, Efficient conversion of monosaccharides into 5-hydroxymethylfurfural and levulinic acid in  $\text{InCl}_3\text{-H}_2\text{O}$  medium, Catal. Commun., 2014, 50, 17-20.

8 A. Osatiashtiani, A. F. Lee, D. R. Brown, J. A. Melero, G. Moralese, K. Wilson, Bifunctional  $\text{SO}_4/\text{ZrO}_2$  catalysts for 5-hydroxymethylfurfural (5-HMF) production from glucose, Catal. Sci. Technol., 2014, 4, 333-342.

9 R. Otomo, T. Yokoi, J. N. Kondo, T. Tatsumi, Dealuminated Beta zeolite as effective bifunctional catalyst for direct transformation of glucose to 5-hydroxymethylfurfural, Appl. Catal. A: Gen., 2014, 470, 318-326.

10 Q. Xu, Z. Zhu, Y. Tian, J. Deng, J. Shi, Y. Fu, Sn-MCM-41 as efficient catalyst for the conversion of glucose into 5-hydroxymethylfurfural in ionic liquids, BioResources., 2014, 9, 303-315.

11 J. Zhang, J. Li, L. Lin, Dehydration of sugar mixture to HMF and furfural over  $\text{SO}_4^{2-}/\text{ZrO}_2\text{-TiO}_2$  catalyst, BioResources., 2014, 9, 4194-4204.

12 K. Nakajima, R. Noma, M. Kitano, M. Hara, Selective glucose transformation by titania as a heterogeneous Lewis acid catalyst, J. Mol. Catal. A: Chem., 2014, 388-389, 100-105.

13 F. Tao, C. Zhuang, Y. Cui, J. Xu, Dehydration of glucose into 5-hydroxymethylfurfural in

- SO<sub>3</sub>H-functionalized ionic liquids, *Chinese. Chem. Lett.*, 2014, 25, 757-761.
- 14 M. I. Alam, S. De, B. Singh, B. Saha, M. M. A. Omar, Titanium hydrogenphosphate: An efficient dual acidic catalyst for 5-hydroxymethylfurfural (HMF) production, *Appl. Catal. A: Gen.*, 2014, 486, 42-48.
- 15 I. J. Morales, J. S. Gonzalez, A. J. Lopez, P. M. Torres, Glucose dehydration to 5-hydroxymethylfurfural on zirconium containing mesoporous MCM-41 silica catalysts, *Fuel*, 2014, 118, 265-271.
- 16 V. Degirmenci, E. J. M. Hensen, Development of a Heterogeneous Catalyst for Lignocellulosic Biomass Conversion: Glucose Dehydration by Metal Chlorides in a Silica-Supported Ionic Liquid Layer, *Environ. Prog. Sustain.*, 2014, 33, 657-662.
- 17 I. J. Morales, A. T. Ortiz, J. S. Gonzalez, P. M. Torres, A. J. Lopez, Selective dehydration of glucose to 5-hydroxymethylfurfural on acidic mesoporous tantalum phosphate, *Appl. Catal. B: Environ.*, 2014, 144, 22-28.
- 18 I. J. Morales, M. M. Recio, J. S. Gonzalez, P. M. Torres, A. J. Lopez, Mesoporous tantalum oxide as catalyst for dehydration of glucose to 5-hydroxymethylfurfural, *Appl. Catal. B: Environ.*, 2014, 154-155, 190-196.
- 19 A. Jain, A. M. Shore, S. C. Jonnalagadda, K. V. Ramanujachary, A. Mugweru, Conversion of fructose, glucose and sucrose to 5-hydroxymethyl-2-furfural over mesoporous zirconium phosphate catalyst, *Appl. Catal. A: Gen.*, 2015, 489, 72-76.
- 20 C. S. Lanziano, F. Rodriguez, S. C. Rabelo, R. Guirardello, V. T. Silva, C. B. Rodella, Catalytic Conversion of Glucose Using TiO<sub>2</sub> Catalysts, *Chem. Eng. Transactions.*, 2014, 37, 589-594.
- 21 L. Wu, J. Song, B. Zhang, B. Zhou, H. Zhou, H. Fan, Y. Yang, B. Han, Very efficient conversion of glucose to 5-hydroxymethylfurfural in DBU-based ionic liquids with benzenesulfonate anion, *Green Chem.*, 2014, 16, 3935-3941.
- 22 C. Yue, M. S. Rigutto, E. J. M. Hensen, Glucose Dehydration to 5-Hydroxymethylfurfural by a Combination of a Basic Zirconosilicate and a Solid Acid, *Catal Lett.*, 2014, 144, 2121-2128.
- 23 Z. F. Fang, B. Liu, J. Luo, Y. Ren, Z. Zhang, Efficient conversion of carbohydrates into 5-

- hydroxymethylfurfural catalyzed by the chromium-exchanged montmorillonite K-10 clay, *Biomass. Bioenergy.*, 2014, 60, 171-177.
- 24 Q. Ren, Y. Huang, H. Ma, J. Gao, J. Xu, Catalytic conversion of carbohydrates to 5-hydroxymethylfurfural promoted by metal halides, *Chinese. J. Catal.*, 2014, 35, 496-500.
- 25 Y. Yan, Q. Wu, X. Guo, J. Lu, Z. H. Li, Y. Zhang, Y. Tang, Condition screening and process investigation of aldose transformation in borate-containing acidic phosphate buffer system under microwave irradiation, *RSC Adv.*, 2014, 4, 39453-39462.
- 26 G. Morales, J. A. Melero, M. Paniagua, J. Iglesias, B. Hernandez, M. Sanz, Sulfonic acid heterogeneous catalysts for dehydration of C6-monosaccharides to 5-hydroxymethylfurfural in dimethyl sulfoxide, *Chinese. J. Catal.*, 2014, 35, 644-655.
- 27 J. Shi, W. Liu, N. Wang, Y. Yang, H. Wang, Production of 5-hydroxymethylfurfural from monoand disaccharides in the presence of ionic liquids, *Catal Lett.*, 2014, 144, 252-260.
- 28 M. Walia, U. Sharma, V. K. Agnihotri, B. Singh, Silica-supported boric acid assisted conversion of mono- and poly-saccharides to 5-hydroxymethylfurfural in ionic liquid, *RSC Adv.*, 2014, 4, 14414-14418.
- 29 M. Hara, Heterogeneous Lewis Acid Catalysts Workable in Water, *Bull. Chem. Soc. Jpn.*, 2014, 87, 931-941.
- 30 L. Wang, H. Wang, F. Liu, A. Zheng, J. Zhang, Q. Sun, J. P. Lewis, L. Zhu, X. Meng, F. S. Xiao, Selective Catalytic Production of 5-Hydroxymethylfurfural from Glucose by Adjusting Catalyst Wettability, *ChemSusChem.*, 2014, 7, 402-406.
